# Supplementary material for: Synergy of morphology and phosphorization for enhanced peroxymonosulfate activation over magnetic Fe3O4 catalysts
Source: Royal Society of Chemistry journal article supplement (doi:10.1039/d4nj04685d), 2024-12-06
Supplement: d4nj04685d1.pdf [file d4nj04685d1.pdf]

## Supporting information

### Synergy of Morphology and Phosphorization for Enhanced Peroxymonosulfate Activation over Magnetic Fe<sub>3</sub>O<sub>4</sub> Catalysts

Haidong Lu <sup>a</sup>, Congming Tang<sup>a\*</sup>, Kai Ma<sup>b</sup> and Xinli Li<sup>a1\*</sup>

(<sup>a</sup>School of Chemistry and Chemical Engineering, Chongqing University of Technology, Chongqing 400054, PR China; <sup>b</sup>Synthetic Lubricants Research Institute of Sinopec Lubricant Co., Ltd., Chongqing 400039, PR China)

#### S1. Preparation of catalysts

##### S1.1. RC-Fe<sub>2</sub>O<sub>3</sub>, THB-Fe<sub>2</sub>O<sub>3</sub> and QC-Fe<sub>2</sub>O<sub>3</sub>

RC-Fe<sub>2</sub>O<sub>3</sub>: Under alkaline conditions, RC-Fe<sub>2</sub>O<sub>3</sub> was synthesized by hydrothermal method and then calcined in air. In a typical experiment, 10 mmol of Fe(NO<sub>3</sub>)<sub>3</sub>·9H<sub>2</sub>O and 36 mmol of urea (CO(NH<sub>2</sub>)<sub>2</sub>) were dissolved in 60 mL of deionized water and stirred at room temperature for 30 minutes. Next, the obtained solution transferred to a 100 mL stainless steel hydrothermal reactor with the lined polytetrafluoroethylene, placed it in an oven, and maintained it at 120 °C for 8 hours. Then a precipitate was formed, washed several times with deionized water and anhydrous ethanol, and dried at 50 °C for 3 hours. The obtained sample was calcined in air at 500 °C for 3 hours.

THB-Fe<sub>2</sub>O<sub>3</sub>: 0.337g of K<sub>4</sub>[Fe(CN)<sub>6</sub>]·3H<sub>2</sub>O was dissolved in 40 mL of sodium carboxymethyl cellulose (CMC, 300-800 MPa s, 1.25 g L<sup>-1</sup>) solution. Then, 0.5 g of polyvinylpyrrolidone (PVP-k30) and 0.30 mL of hydrazine hydrate solution (N<sub>2</sub>H<sub>4</sub>·H<sub>2</sub>O, 80%) were added, and dispersed with ultrasonic treatment until PVP-k30 was completely dissolved. The mixture was transferred to a 100 mL stainless steel hydrothermal reactor with the lined polytetrafluoroethylene, heated to 160 °C, and remained at this temperature for 6 hours. After the hydrothermal reaction, the suspension was centrifuged, and the solid was washed four times with deionized water and once with ethanol. The

---

\*Corresponding author. Tel.: +86 23 62563250, E-mail address: tcmtang2001@cqut.edu.cn (C. M. Tang) and lixinlitcm@163.com (X. L. Li).

sample was dried at 80 ° C for 5 hours and calcined in air at 300 ° C for 3 hours. The obtained sample was labeled as THB-Fe<sub>2</sub>O<sub>3</sub>.

QC-Fe<sub>2</sub>O<sub>3</sub>: The amounts of K<sub>4</sub>[Fe(CN)<sub>6</sub>]-3H<sub>2</sub>O and hydrazine hydrate solution were changed to 0.253 g and 0.90 mL, respectively. The other procedures were the same as those of THB- Fe<sub>2</sub>O<sub>3</sub>, and the obtained sample was marked as QC- Fe<sub>2</sub>O<sub>3</sub>.

### **S1.2. RC-Fe<sub>3</sub>O<sub>4</sub>, QC-Fe<sub>3</sub>O<sub>4</sub> and THB-Fe<sub>3</sub>O<sub>4</sub>**

RC-Fe<sub>3</sub>O<sub>4</sub>, QC-Fe<sub>3</sub>O<sub>4</sub> and THB-Fe<sub>3</sub>O<sub>4</sub> were prepared with lactic acid selective reduction. RC-Fe<sub>3</sub>O<sub>4</sub>: 0.5 g of RC-Fe<sub>2</sub>O<sub>3</sub> was placed in tubular quartz reactor with an inner diameter of 4 mm, and both ends were sealed with quartz wool to fix sample. The sample was pretreated with high purity N<sub>2</sub> (flow rate 2.5 mL/min) at 360°C for 1 h, and then lactic acid (10 wt%) was pumped into the quartz tubular reactor via a peristaltic pump with a flow rate of 2 mL/h, treated for 6 h, and the obtained sample was marked as RC-Fe<sub>3</sub>O<sub>4</sub>. QC-Fe<sub>3</sub>O<sub>4</sub> and THB-Fe<sub>3</sub>O<sub>4</sub> were prepared with the similar method, as long as the precursor of RC-Fe<sub>2</sub>O<sub>3</sub> was changed to QC-Fe<sub>2</sub>O<sub>3</sub> and THB-Fe<sub>2</sub>O<sub>3</sub>, respectively.

### **S1.3. P-RC-Fe<sub>3</sub>O<sub>4</sub>, P-QC-Fe<sub>3</sub>O<sub>4</sub> and P-THB-Fe<sub>3</sub>O<sub>4</sub>**

0.2 g of as-prepared RC-Fe<sub>3</sub>O<sub>4</sub> was placed downstream and 2 g of sodium hypophosphite monohydrate placed upstream of a quartz boat in a tube furnace, heated to 400 °C at 5 °C/min, and remained at 400 °C for 2 hours under a nitrogen atmosphere. The resultant sample was marked as P-RC-Fe<sub>3</sub>O<sub>4</sub>. QC-Fe<sub>3</sub>O<sub>4</sub> and THB-Fe<sub>3</sub>O<sub>4</sub> were treated with the similar method, respectively, and the obtained samples were marked as P-QC-Fe<sub>3</sub>O<sub>4</sub> and P-THB-Fe<sub>3</sub>O<sub>4</sub>.

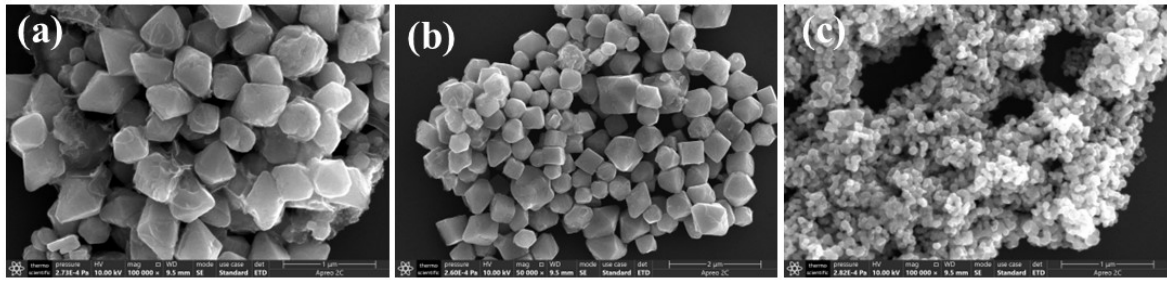

**Fig. S1.** Morphologies of nano-Fe<sub>3</sub>O<sub>4</sub>: (a) THB, (b) QC and (c) RC.

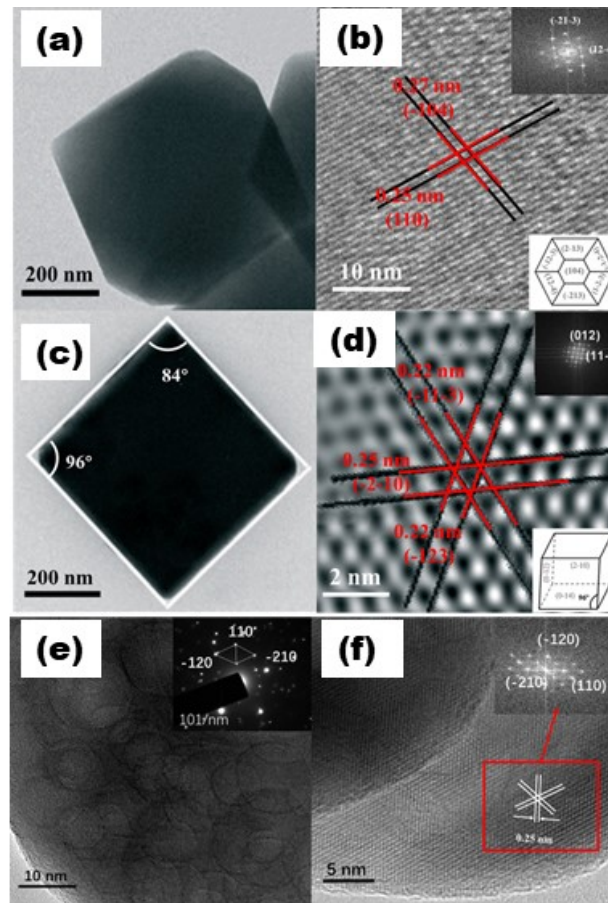

**Fig. S2.** Morphologies and structures of  $\alpha$ -Fe<sub>2</sub>O<sub>3</sub><sup>1-2</sup>. (a) TEM and (b) HRTEM images of  $\alpha$ -Fe<sub>2</sub>O<sub>3</sub>-THB, insets: FFT pattern and drawing of a hexagon; (c) TEM and (d) HRTEM images of  $\alpha$ -Fe<sub>2</sub>O<sub>3</sub>-QC, insets: FFT pattern and drawing of a cube; (e) TEM and (f) HRTEM images of the  $\alpha$ -Fe<sub>2</sub>O<sub>3</sub>-RC, insets: SEAD pattern and FFT pattern.



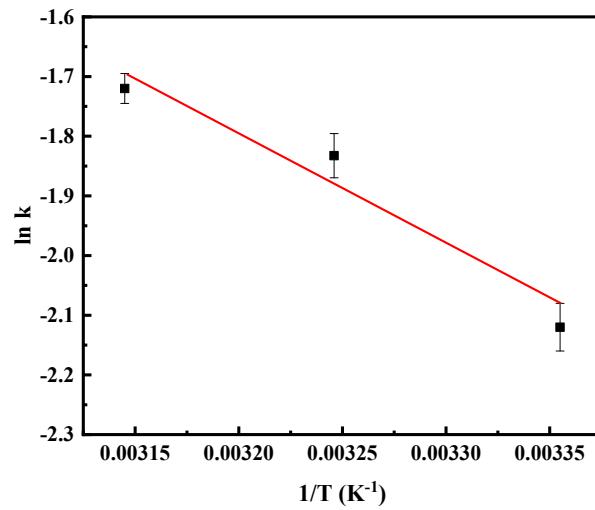

**Fig. S6.** Arrhenius plot of TC degradation over P-RC-Fe<sub>3</sub>O<sub>4</sub>/PMS system

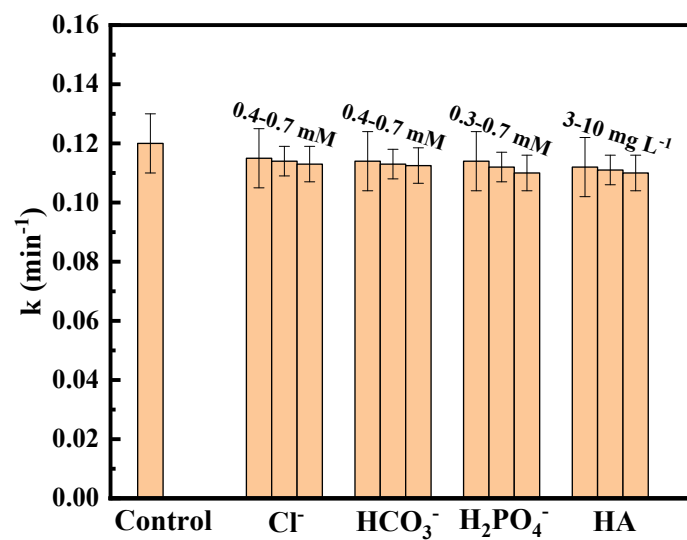

**Fig. S7.** Reaction rate constants under different experimental conditions.

**Table S1** Comparison of PMS activation for TC removal

| Catalysts                                        | Catalyst usage        | C <sub>PMS</sub> (g L <sup>-1</sup> ) | C <sub>TC</sub> (mg L <sup>-1</sup> ) | Removal | References                                                |
|--------------------------------------------------|-----------------------|---------------------------------------|---------------------------------------|---------|-----------------------------------------------------------|
| CoFe@PPBC                                        | 0.1 gL <sup>-1</sup>  | 1                                     | 50                                    | 86.2%   | <i>Sep. Purif. Technol.</i> <b>2022</b> , 287, 120533     |
| CoS <sub>x</sub>                                 | 0.2 gL <sup>-1</sup>  | 0.3                                   | 30                                    | 99%     | <i>Chem. Eng. J.</i> <b>2020</b> , 381, 122768            |
| FONC@PAC                                         | 0.5 gL <sup>-1</sup>  | 0.45                                  | 15                                    | 86.9%   | <i>Chem. Eng. J.</i> <b>2022</b> , 441, 136061            |
| CoPx@NC                                          | 0.1 gL <sup>-1</sup>  | 0.3                                   | 30                                    | 90%     | <i>Sep. Purif. Technol.</i> <b>2023</b> , 322, 124257     |
| Fe <sub>3</sub> O <sub>4</sub> -NCS <sub>x</sub> | 0.2 gL <sup>-1</sup>  | 0.37                                  | 20                                    | 97.1%   | <i>Chemosphere</i> <b>2021</b> , 263, 128011              |
| Co <sub>3</sub> O <sub>4</sub> /CPANI            | 0.15 gL <sup>-1</sup> | 0.15                                  | 20                                    | 92.11%  | <i>J. Clean. Prod.</i> <b>2023</b> , 405, 137023          |
| Co@N-MC                                          | 0.04 gL <sup>-1</sup> | 0.2                                   | 25                                    | 91.27%  | <i>J. Water. Processes Eng.</i> <b>2023</b> , 54, 104043  |
| BS900                                            | 0.5 gL <sup>-1</sup>  | 0.3                                   | 40                                    | 87.6%   | <i>J. Environ. Chem. Eng.</i> <b>2023</b> , 11(6), 111365 |
| CuCo@GCNs                                        | 0.1 gL <sup>-1</sup>  | 0.307                                 | 20                                    | 95.3%   | <i>Chem. Eng. J.</i> <b>2022</b> , 450, 138302            |
| CBB50                                            | 0.2 gL <sup>-1</sup>  | 0.123                                 | 10                                    | 90.3%   | <i>Chem. Eng. J.</i> <b>2022</b> , 431, 134054            |
| CW/4Co/2BN QDs                                   | 0.2 gL <sup>-1</sup>  | 0.3                                   | 10                                    | 94.8%   | <i>J. Mater. Sci. Technol.</i> <b>2024</b> , 170, 11-24   |
| CuS/g-C <sub>3</sub> N <sub>4</sub>              | 0.2 gL <sup>-1</sup>  | 0.15                                  | 20                                    | 97.46%  | <i>Chem. Eng. J.</i> <b>2024</b> , 483, 149082            |
| BFMO                                             | 0.4 gL <sup>-1</sup>  | 0.092                                 | 50                                    | 95.7%   | <i>J. Environ. Chem. Eng.</i> <b>2024</b> , 114338        |

|                                                                  |                       |       |    |        |                                                           |
|------------------------------------------------------------------|-----------------------|-------|----|--------|-----------------------------------------------------------|
| NiO/SnO <sub>2</sub>                                             | 0.4 gL <sup>-1</sup>  | 0.615 | 20 | 90.6%  | <i>Appl. Surf. Sci.</i> <b>2022</b> , 604, 154537         |
| La <sub>2</sub> CuO <sub>4</sub>                                 | 0.2 gL <sup>-1</sup>  | 0.615 | 20 | 96.05% | <i>Chemosphere</i> <b>2023</b> , 332, 138906              |
| CuFe <sub>2</sub> O <sub>4</sub> /Bi <sub>2</sub> O <sub>3</sub> | 0.2 gL <sup>-1</sup>  | 0.4   | 30 | 95.7%  | <i>Chem. Eng. J.</i> <b>2023</b> , 473, 145282            |
| FeCo-MOF                                                         | 0.1 gL <sup>-1</sup>  | 0.615 | 20 | 91%    | <i>Arab. J. Chem.</i> <b>2024</b> , 17(1), 105483         |
| FeS@NBC                                                          | 0.07 gL <sup>-1</sup> | 0.3   | 20 | 87.6%  | <i>J. Environ. Chem. Eng.</i> <b>2024</b> , 12(3), 113027 |
| P-RC-Fe <sub>3</sub> O <sub>4</sub>                              | 0.1 gL <sup>-1</sup>  | 0.3   | 20 | 90%    | This study                                                |

**Table S2** The equations for generation of active species

| Equations                                                                                                                                                                                       | Serial number |
|-------------------------------------------------------------------------------------------------------------------------------------------------------------------------------------------------|---------------|
| $\text{Fe}^{\delta+} + \text{HSO}_5^- \rightarrow \text{Fe}^{2+} + \text{SO}_4^{\cdot-} + \text{OH}^-$                                                                                          | (1)           |
| $\text{SO}_4^{\cdot-} + \text{H}_2\text{O} \rightarrow \text{H}^+ + \text{SO}_4^{2-} + \cdot\text{OH}$                                                                                          | (2)           |
| $\text{SO}_4^{\cdot-} + \text{OH}^- \rightarrow \text{H}^+ + \text{SO}_4^{2-} + \cdot\text{OH}$                                                                                                 | (3)           |
| $\text{P}^{\delta-} + \text{HSO}_5^- \rightarrow \text{PO}_4^{3-} + \text{SO}_4^{\cdot-} + \text{OH}^-$                                                                                         | (4)           |
| $\text{SO}_4^{\cdot-} + \text{H}_2\text{O} \rightarrow \text{H}^+ + \text{SO}_4^{2-} + \cdot\text{OH}$                                                                                          | (5)           |
| $\text{HSO}_5^- \rightarrow \text{SO}_5^{\cdot-} + \text{H}^+ + \text{e}^-$                                                                                                                     | (6)           |
| $\text{SO}_5^{\cdot-} + \text{SO}_5^{\cdot-} \rightarrow \text{S}_2\text{O}_8^{2-} + {}^1\text{O}_2$                                                                                            | (7)           |
| $\text{SO}_5^{\cdot-} + \text{SO}_5^{\cdot-} \rightarrow 2\text{SO}_4^{2-} + {}^1\text{O}_2$                                                                                                    | (8)           |
| $\text{HSO}_5^- + \text{H}_2\text{O} \rightarrow \text{H}_2\text{O}_2 + \text{HSO}_4^-$                                                                                                         | (9)           |
| $\text{H}_2\text{O}_2 + \cdot\text{OH} \rightarrow \text{HO}_2\cdot + \text{H}_2\text{O}$                                                                                                       | (10)          |
| $\text{HO}_2\cdot \rightarrow \text{O}_2^{\cdot-} + \text{H}^+$                                                                                                                                 | (11)          |
| $\text{HO}_2\cdot \rightarrow \text{O}_2^{\cdot-} + \text{H}^+\text{O}_2^{\cdot-} + \text{O}_2^{\cdot-} + 2\text{H}_2\text{O} \rightarrow {}^1\text{O}_2 + \text{H}_2\text{O}_2 + 2\text{OH}^-$ | (12)          |
| $\text{O}_2^{\cdot-} + \cdot\text{OH} \rightarrow {}^1\text{O}_2 + \text{OH}^-$                                                                                                                 | (13)          |

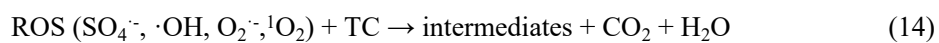

## References

1. Gu, L. L.; Su, Q.; Jiang, W.; Yao, Y.; Pang, Y. J.; Ji, W. J.; Au, C. T., How do the unique Au/ $\alpha$ -Fe<sub>2</sub>O<sub>3</sub> interfacial structures determine activity in CO oxidation? *Catal. Sci. Technol.* **2018**, *8* (22), 5782-5793.
2. Yin, C.; Li, X.; Dai, Y.; Chen, Z.; Yang, D.; Liu, R.; Zou, W.; Tang, C.; Dong, L., The facet-regulated oxidative dehydrogenation of lactic acid to pyruvic acid on  $\alpha$ -Fe<sub>2</sub>O<sub>3</sub>. *Green Chem.* **2021**, *23* (1), 328-332.
